# Supplementary material for: Cytochrome P450 2D6 genotype–phenotype characterization through population pharmacokinetic modeling of tedatioxetine
Source: PubMed Central journal article supplement — CPT Pharmacometrics Syst Pharmacol. 2021 Aug 15;10(9):983–93. doi: 10.1002/psp4.12635 (PMC8452298; doi:10.1002/psp4.12635), 2021-08-15

**Figure S3** Histograms of ETAs with corresponding density lines (black). The solid lines represent estimates originating from rich data and the dashed lines represent sparse data. The red line is the distribution given by the model estimated omega.

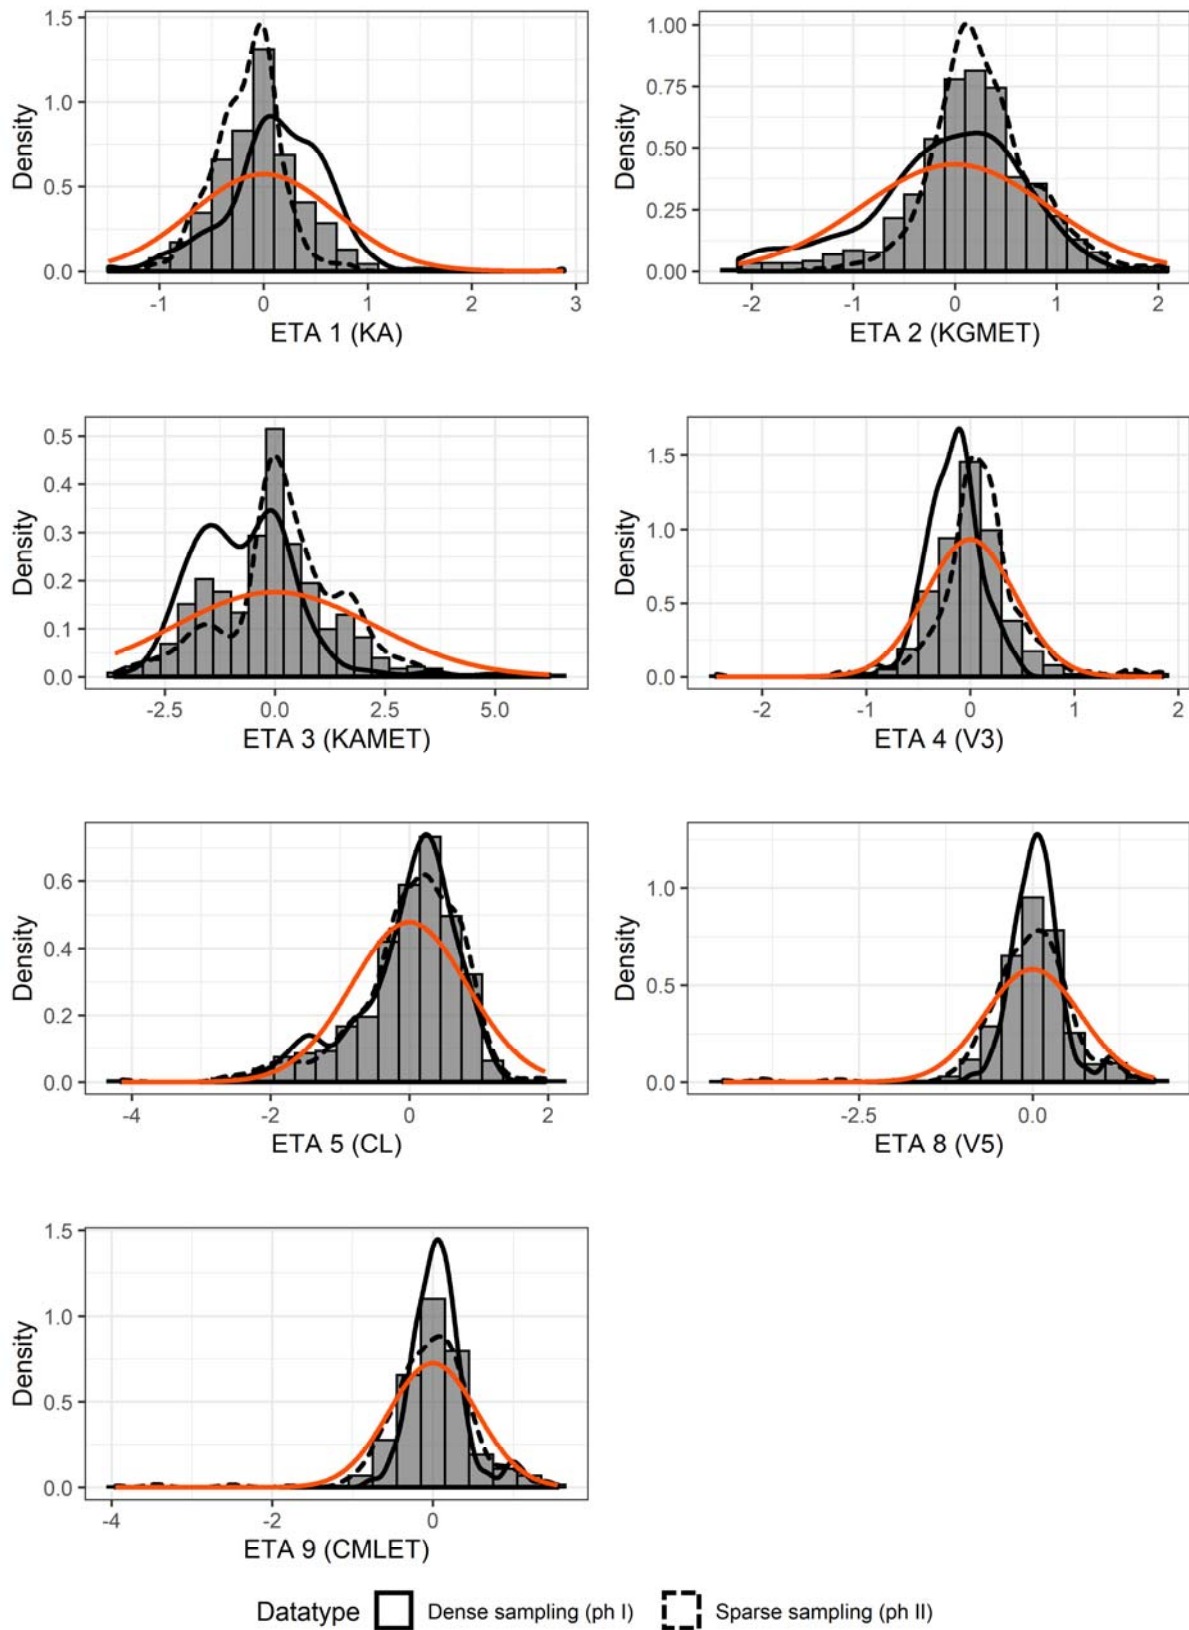

Supplement: PSP4-10-983-s001.pdf [file PSP4-10-983-s001.pdf]
