# Supplementary material for: Cytochrome P450 2D6 genotype–phenotype characterization through population pharmacokinetic modeling of tedatioxetine
Source: PubMed Central journal article supplement — CPT Pharmacometrics Syst Pharmacol. 2021 Aug 15;10(9):983–93. doi: 10.1002/psp4.12635 (PMC8452298; doi:10.1002/psp4.12635), 2021-08-15

**Figure S1** Goodness-of-fit plots for the final population pharmacokinetic model for tedatioxetine and Lu AA37208. Shapes indicate whether the data is based on dense (circles) or sparse (triangles) pharmacokinetic sampling

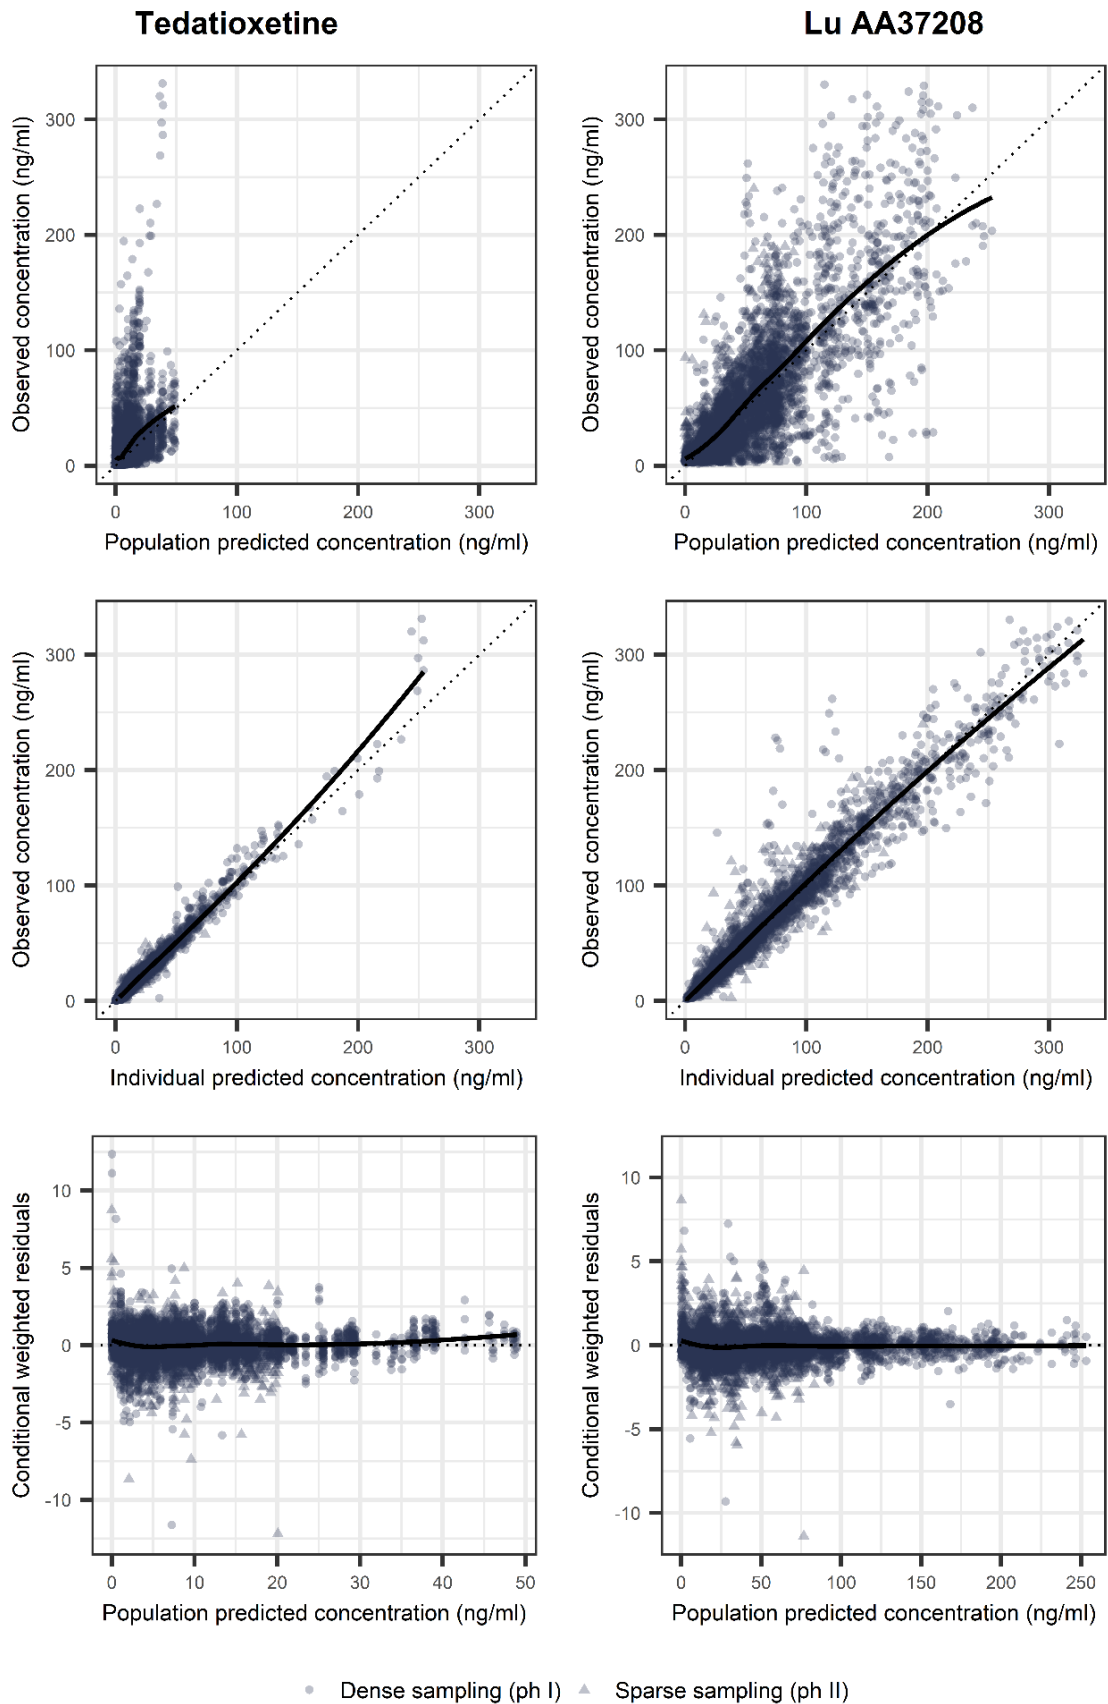

Supplement: PSP4-10-983-s002.pdf [file PSP4-10-983-s002.pdf]
