# Supplementary material for: Cytochrome P450 2D6 genotype–phenotype characterization through population pharmacokinetic modeling of tedatioxetine
Source: PubMed Central journal article supplement — CPT Pharmacometrics Syst Pharmacol. 2021 Aug 15;10(9):983–93. doi: 10.1002/psp4.12635 (PMC8452298; doi:10.1002/psp4.12635), 2021-08-15

**Figure S2** Visual predictive check plot for tedatioxetine and Lu AA37208 based on 500 samples. The black circles represent the observed data, the solid black line is the median of the observed data and the dashed black lines are the 5th and 95th percentiles of the observed data. The blue line is the median of the simulated data and the red lines are the 5th and 95th percentiles of the simulated data. The shaded areas represent the 95% confidence intervals for the simulated median (blue area) and 5th and 95th percentiles (red area).

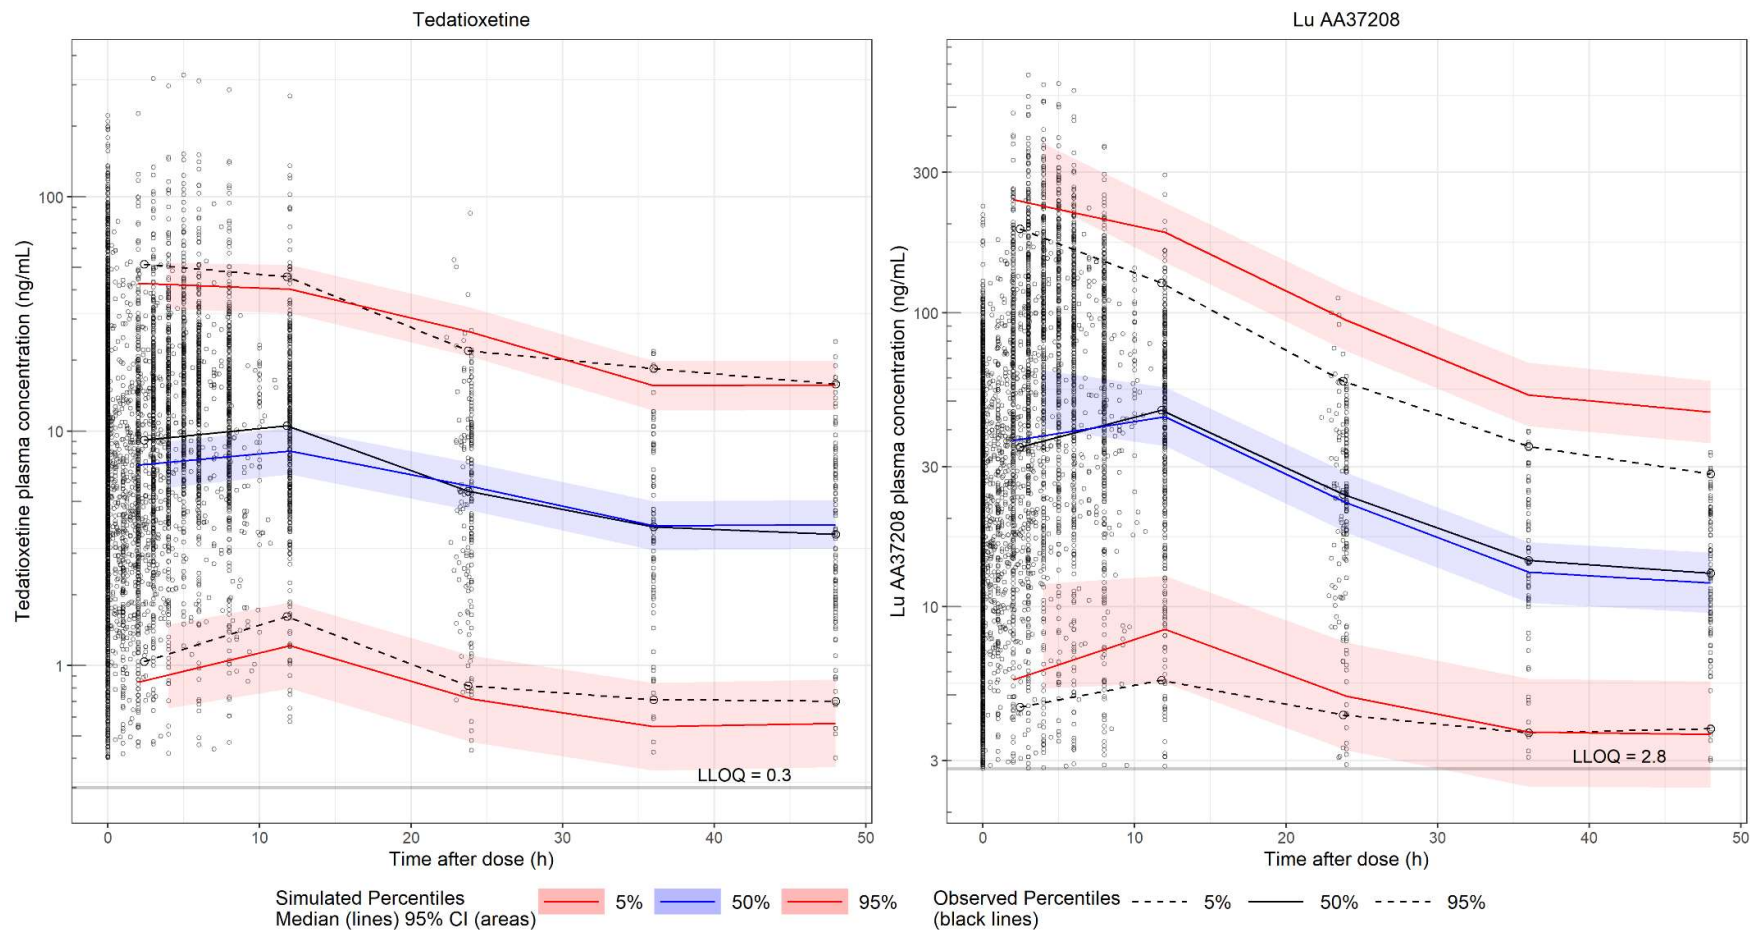

Supplement: PSP4-10-983-s005.pdf [file PSP4-10-983-s005.pdf]
